# Supplementary material for: Treatable Traits in Long COVID: Inhaled corticosteroids and long-acting bronchodilators for small airway dysfunction among symptomatic Long COVID patients without known Asthma
Source: Research Square preprint supplement (doi:10.21203/rs.3.rs-7541120/v1), 2025-10-21
Supplement: Supplementary file 1 [file 385871f2ef22c92840615969.docx]

**Table S1 Supporting Information:** Results of comparing the Comparative data on IgG subclasses, T-cell subsets, and vitamin D.

Supplementary Table 1. Baseline Laboratory predictors including lymphocyte subsets, IgG subclasses, and vitamin D levels in patients with and without small airway dysfunction (SAD)

| **Lab predictors (median (IQR)**) | SAD | NO SAD | p-value |
| --- | --- | --- | --- |
|  |  |  |  |
| Total Lymphocytes | 1.7 (1.38, 2.3) | 1.5 (1.3, 2) | 0.146 |
| CD4 Count | 585 (268.5, 972) | 630.5 (433.5, 946.5) | 0.412 |
| CD8 Count | 355 (210.5, 478) | 337.5 (189.25, 477.75) | 0.223 |
| CD4/CD8 Ratio | 2.1 (1.3, 2.88) | 2 (1.35, 3.05) | 0.393 |
| Act T cells | 39.5 (26.75, 65.25) | 25.5 (15.75, 44.25) | 0.520 |
| IgG1 Subclasses | 5.83 (4.88, 7.01) | 4.74 (4.01, 5.97) | 0.236 |
| IgG2 Subclasses | 4.17 (2.64, 5.11) | 3.79 (2.37, 4.91) | 0.630 |
| IgG3 Subclasses | 0.51 (0.31, 0.76) | 0.47 (0.32, 0.73) | 0.369 |
| IgG4 Subclasses | 0.29 (0.14, 0.41) | 0.27 (0.2, 0.45) | 0.268 |
| Vitamin D | 68 (46, 92) | 68 (44.5, 96) | 0.383 |
