# Supplementary material for: Treatable Traits in Long COVID: Inhaled corticosteroids and long-acting bronchodilators for small airway dysfunction among symptomatic Long COVID patients without known Asthma
Source: Research Square preprint supplement (doi:10.21203/rs.3.rs-7541120/v1), 2025-10-21
Supplement: Supplementary file 2 [file 617a1f0b607ffdc515a6c648.docx]

Appendix S1 in the Supporting Information

**FOT procedure:**
Patients were seated upright at functional residual capacity (FRC), with a nasal clip and supported cheeks to minimise upper airway artefacts. A broadband multifrequency signal (4–30 Hz) was delivered via a mouthpiece. The device maintained an optimal signal-to-noise ratio within a peak-to-peak pressure range of 0.1–0.3 kPa. Calibration was performed using a 1.5 kPa·s·L⁻¹ reference impedance, in line with ERS guidelines. The flow and pressure transducers demonstrated an error margin below 2%. Each session included three to five technically acceptable measurements, with artefacts from irregular breathing, leaks, or swallowing excluded. Mean resistance (Rrs) and reactance (Xrs) values were accepted when the coefficient of variation (CV) was under 10%.

**Spirometry procedure:**
Patients performed forced expiratory manoeuvres after approximately 5 minutes of rest following FOT. The highest FEF25-75% value meeting ATS/ERS acceptability criteria was used for analysis, requiring at least three acceptable and reproducible trials.
